# Supplementary material for: Cooperative Learning in Industrial-sized Biology Classes
Source: Atypon-hosted journal article supplement (doi:10.1187/cbe.06-11-0200), 2007-06-01
Supplement: supplemental_material_b.pdf [file supplemental_material_b.pdf]

**Appendix B: Peer Evaluation Form**

**PEER EVALUATIONS**

**Class** (include class, time and day):

**Name:** \_\_\_\_\_  
# \_\_\_\_\_

**Group Name** \_\_\_\_\_

This is an opportunity to evaluate the contributions of your teammates to group work and exams during the semester. Please write the names of your teammates in the spaces below and give them the scores that you believe they earned. You will have 10 points available to distribute for each member or your group, not counting yourself. (e.g. If you are in a group of 6 people, you each will have 50 points to distribute. A group of 5 would have 40 pts, etc.) If you believe everyone contributed equally, then you should give everyone 10 points. If everyone in the group feels the same way, you will all have an average of 10 points and receive 100% of the group score. An average of 9 would receive 90% of the group exam score, etc. Be fair and accurate in your assessments. If someone in your group didn't contribute adequately (i.e. had not studied, didn't communicate with the rest of the group, frequently missed class, etc), give them fewer points. If someone worked harder than the rest, give that person more than 10 points.

There are some rules that you must observe in assigning points:

- This is not a popularity contest. Don't give anyone a grade that they don't deserve (high or low) for personal reasons or otherwise.
- Contributing to the group does not simply mean who gave the most correct answers. Asking good questions, challenging the group, etc, showing up reliably are also ways to contribute.
- You cannot give anyone in your group more than 15 points.
- You do not have to assign all of your group points, but you cannot assign more than the total number of points allowed for each group [i.e. (# of people in group – 1) x 10pts].

**Group Member:**

**Score:**

|          |       |
|----------|-------|
| 1. _____ | _____ |
| 2. _____ | _____ |
| 3. _____ | _____ |
| 4. _____ | _____ |
| 5. _____ | _____ |
| 6. _____ | _____ |
| 7. _____ | _____ |
| 8. _____ | _____ |

Indicate why you gave someone more than 10 pts.

Indicate why you gave someone less than 10 pts.

If you were to give yourself a score, what would it be? Why?
